# Supplementary material for: Fermentation of increasing ratios of grain starch and straw fiber: effects on hydrogen allocation and methanogenesis through in vitro ruminal batch culture
Source: PeerJ. 2023 Apr 14;11:e15050. doi: 10.7717/peerj.15050 (PMC10108854; doi:10.7717/peerj.15050)
Supplement: Supplemental Information 1 [file peerj-11-15050-s001.xlsx]

## Sheet: Table 2
RGS	run	DMD	GP	VFGP	kGP
0:6	1	488.525	270.788	304.841	4.56142
1:5	1	573.449	311.472	325.58	5.87574
2:4	1	640.128	355.222	362.804	6.7095
3:3	1	715.627	386.993	391.5	7.75788
4:2	1	786.873	429.99	424.002	10.9364
5:1	1	864.358	449.915	437.657	14.1156
6:0	1	923.209	457.416	443.007	18.1803
0:6	2	536.113	266.33	327.448	4.25654
1:5	2	610.415	294.221	347.423	4.26408
2:4	2	657.801	364.766	401.811	5.35045
3:3	2	710.013	382.953	403.656	6.5716
4:2	2	774.415	411.674	410.908	9.51366
5:1	2	849.165	411.12	399.728	13.3666
6:0	2	913.714	430.856	415.283	18.6541
0:6	3	508.025	272.01	289.385	7.46972
1:5	3	551.987	309.835	340.499	5.52394
2:4	3	636.566	359.701	387.873	5.46072
3:3	3	693.45	382.478	396.991	6.57664
4:2	3	770.422	395.649	397.551	8.48694
5:1	3	848.196	423.671	416.404	10.9402
6:0	3	910.935	445.198	436.236	11.4172

## Sheet: Table 3
RGS	run	CH4 mL/g of DM	CH4 mL/g of DDM	VFCH4	kCH4	gH2 mL/g of DM	gH2 mL/g of DDM	VFH2	kH2	μH2
0:6	1	46.7469	95.6898	50.2553	6.33521	0.131239	0.268643	0.122249	21.946	6.15646
1:5	1	50.9295	88.8125	59.2018	4.3612	0.134556	0.234643	0.134333	21.5252	4.91885
2:4	1	53.6724	83.8464	56.8082	5.56311	0.123939	0.193616	0.123627	17.4789	4.62504
3:3	1	58.57	81.8443	57.7665	7.85049	0.127344	0.177947	0.126418	15.647	6.04046
4:2	1	61.6656	78.368	57.7299	10.4088	0.130202	0.165467	0.130649	19.5344	5.509
5:1	1	61.0676	70.6508	54.1679	13.2222	0.110358	0.127677	0.107304	26.9269	4.37748
6:0	1	55.6049	60.23	49.1425	15.7737	0.10211	0.110603	0.106987	34.3766	4.43259
0:6	2	40.9724	76.4249	42.1202	9.17119	0.0778715	0.145252	0.0811362	31.6569	3.65758
1:5	2	46.1034	75.528	48.5193	7.60852	0.0920779	0.150845	0.0927097	53.8646	3.9229
2:4	2	51.4668	78.2407	52.9181	8.40243	0.0981813	0.149257	0.0986172	44.071	7.37674
3:3	2	54.4888	76.7433	53.5562	9.07143	0.107203	0.150987	0.110471	33.0823	5.61867
4:2	2	55.9761	72.2818	51.8173	11.3106	0.0976192	0.126055	0.100478	30.2631	11.3829
5:1	2	51.7828	60.9808	46.4079	14.4535	0.0868708	0.102301	0.0897669	20.3835	5.58794
6:0	2	46.3547	50.7322	40.136	22.4434	0.0575935	0.0630323	0.0513915	43.2365	10.4203
0:6	3	46.6689	91.8634	45.9367	9.69811	0.0811722	0.15978	0.0808647	48.3749	2.6608
1:5	3	51.0791	92.5367	52.496	8.11507	0.103051	0.18669	0.102169	54.5249	2.81744
2:4	3	55.1977	86.7117	56.0121	7.65606	0.0849894	0.133512	0.0876826	29.3424	4.68238
3:3	3	59.9393	86.4363	57.3728	8.51098	0.0897112	0.129369	0.09307	31.3356	6.22119
4:2	3	59.1911	76.8295	58.314	7.70349	0.0787102	0.102165	0.0796535	31.3901	3.15578
5:1	3	60.3443	71.1443	55.2176	10.6021	0.0974641	0.114907	0.101724	38.3009	9.65311
6:0	3	55.5831	61.0176	51.0321	11.3935	0.0688501	0.0755818	0.0686436	24.1884	9.1554

## Sheet: Table 4
RGS	run	pH	Total VFA	Acetate	Propionate	Butyrate	Isobutyrate	Valerate	Isovalerate	Acetate to propionate ratio
0:6	1	6.505	58.5235	73.005	18.4129	5.60741	0.921646	0.866584	1.18643	3.97329
1:5	1	6.4525	68.9611	70.1285	20.4988	6.01307	0.989428	0.946131	1.42402	3.42258
2:4	1	6.4175	71.1409	69.1809	21.5556	5.75698	0.993989	0.975624	1.53688	3.22167
3:3	1	6.3575	80.6307	66.7201	23.503	5.91765	1.04686	1.04956	1.76284	2.83912
4:2	1	6.315	86.1648	65.0122	25.2623	5.67504	1.06321	1.10801	1.8793	2.57363
5:1	1	6.2425	91.988	63.3069	27.1594	5.4038	1.04497	1.15247	1.9325	2.33096
6:0	1	6.1725	90.5566	60.6402	29.9709	5.24959	1.01806	1.20852	1.91271	2.02341
0:6	2	6.6175	50.61	69.3725	21.1547	6.07486	1.12302	0.829915	1.44502	3.27991
1:5	2	6.5725	58.1667	68.0754	21.267	6.93487	1.1269	0.954188	1.64172	3.2013
2:4	2	6.535	61.6537	66.8686	21.8492	7.25323	1.13805	1.05566	1.83535	3.06065
3:3	2	6.505	67.6988	66.1288	22.574	7.17392	1.08826	1.11811	1.91691	2.9345
4:2	2	6.4575	72.6402	64.3005	24.2111	7.16494	1.07762	1.20594	2.03987	2.65641
5:1	2	6.415	75.7457	61.8303	27.488	6.56843	0.980357	1.19109	1.94185	2.2495
6:0	2	6.3675	79.027	59.9924	30.5304	5.6075	0.838883	1.20859	1.82224	1.96512
0:6	3	6.6075	61.2208	70.7442	19.8325	5.99501	1.08225	0.868946	1.47713	3.56734
1:5	3	6.555	66.0137	68.6801	20.9027	6.53536	1.15563	0.997065	1.72911	3.2859
2:4	3	6.515	66.2552	68.1773	21.1303	6.54728	1.16152	1.10073	1.88286	3.23316
3:3	3	6.4675	67.8087	65.9058	22.6899	6.9154	1.22381	1.18644	2.07868	2.91058
4:2	3	6.415	78.2361	63.9152	24.3617	6.99334	1.24824	1.28149	2.19998	2.62393
5:1	3	6.35	87.0112	62.1361	26.2104	6.942	1.19382	1.32068	2.19697	2.37071
6:0	3	6.275	88.3351	60.5528	28.3272	6.60933	1.09905	1.36233	2.04929	2.13837

## Sheet: Table 5
RGS	run	PNH2 mM	PNH2 mM/g of DDM	RNH2	CH4 Molar perentage	gH2 Molar perentage	Others Molar perentage	NH3-N	MCP
0:6	1	80.9891	165.783	138.602	48.7012	0.0683647	51.2304	19.2839	0.668131
1:5	1	90.5983	157.988	131.393	46.9405	0.0620081	52.9975	21.8701	0.689434
2:4	1	90.7124	141.71	127.796	48.8115	0.0563577	51.1322	21.8748	0.72963
3:3	1	97.6169	136.407	121.054	48.9544	0.05322	50.9924	22.4611	0.776544
4:2	1	99.3092	126.207	115.251	50.0594	0.0528469	49.8878	22.8596	0.810252
5:1	1	100.512	116.285	109.267	48.4116	0.0437434	51.5447	22.8874	0.836206
6:0	1	91.232	98.8206	100.723	47.9412	0.0440179	52.0148	20.0907	1.08605
0:6	2	65.6464	122.449	129.711	52.6576	0.0500394	47.2923	16.0209	0.788422
1:5	2	74.6807	122.344	128.411	51.5366	0.0514643	48.412	16.9109	0.746974
2:4	2	77.5346	117.869	125.78	54.7963	0.0522657	45.1515	16.7913	0.79219
3:3	2	83.2805	117.294	123.173	53.3764	0.0525073	46.5711	17.3253	0.841766
4:2	2	85.4211	110.304	117.629	52.8176	0.046055	47.1364	17.2412	0.858453
5:1	2	81.9023	96.4504	108.137	50.3596	0.042242	49.5982	15.2363	0.975314
6:0	2	78.4854	85.8972	99.3163	46.4704	0.0288685	53.5007	12.8926	1.12716
0:6	3	81.7109	160.84	133.464	48.2191	0.0419342	51.739	16.4146	0.807842
1:5	3	85.2304	154.407	129.113	50.032	0.0504642	49.9175	18.118	0.762121
2:4	3	84.4647	132.688	127.658	53.9669	0.0415489	45.9916	18.4486	0.827015
3:3	3	82.6892	119.243	122.135	59.1247	0.0442469	40.831	23.4721	0.819167
4:2	3	91.1248	118.279	116.47	52.3557	0.0348105	47.6095	23.0131	0.841975
5:1	3	96.4329	113.692	110.816	49.8691	0.0402749	50.0907	21.8896	0.906131
6:0	3	92.5781	101.63	104.783	47.2325	0.0292537	52.7382	20.2988	1.01253

## Sheet: Figure 1 A
Time/h	0:6	1:5	2:4	3:3	4:2	5:1	6:0
0	0	0	0	0	0	0	0
0.5	6.49714	9.12603	9.26206	8.97866	10.483	10.4832	17.9043
1	11.1906	16.3483	16.521	16.3139	18.6094	18.7917	25.4824
2	18.9096	30.636	34.7872	35.1531	38.8034	39.1426	42.5124
3	26.9195	44.7666	55.3542	56.6377	62.1668	64.5197	65.5381
4	35.104	58.9954	74.7708	78.403	86.9725	92.6868	94.9137
5	44.5685	72.4587	92.8982	100.429	112.652	122.126	127.495
6	53.3348	84.6856	109.102	122.535	139.002	152.221	160.285
7	61.6162	97.5209	123.917	143.919	164.092	180.737	190.972
8	69.8588	108.492	139.605	164.041	189.548	207.632	221.576
9	76.7633	119.09	153.27	180.956	211.956	231.922	247.808
10	84.812	128.962	164.059	197.25	230.809	252.54	270.73
11	92.2013	139.442	175.444	211.159	247.428	270.737	289.03
12	100.832	149.745	183.297	221.52	261.06	284.564	303.312
13	110.626	160.579	191.965	232.523	272.112	297.427	316.365
14	119.334	170.686	200.136	241.001	282.188	307.951	326.837
15	128.43	180.793	207.157	250.541	290.03	317.203	336.081
16	136.712	190.332	217.133	258.016	298.908	324.773	342.909
17	145.012	199.144	224.987	265.853	305.552	333.082	351.029
18	152.634	207.249	234.13	272.907	311.362	339.154	357.233
19	159.345	215.786	241.389	278.519	318.29	344.447	362.167
20	166.792	222.636	247.735	284.692	323.613	351.319	368.267
21	173.231	230.113	256.501	290.865	327.96	356.223	373.909
22	178.623	236.668	262.789	295.755	333.039	360.243	378.135
23	185.256	241.948	268.124	299.903	338.545	363.793	381.674
24	190.745	248.503	276.553	305.495	343.055	369.701	384.839
25	195.574	254.391	282.304	310.866	346.915	374.214	391.147
26	200.636	259.336	287.203	315.215	350.43	377.907	395.415
27	206.318	263.791	294.898	318.983	356.382	381.374	398.975
28	210.721	269.915	300.273	323.252	360.852	384.369	401.91
29	214.6	274.468	304.775	328.623	364.57	389.785	404.763
30	217.78	278.491	308.504	332.451	367.84	393.888	409.384
31	223.036	281.847	315.961	335.878	370.624	397.006	413.548
32	226.876	286.636	320.166	338.664	375.743	399.755	416.65
33	230.038	290.816	323.656	341.209	379.603	402.258	419.294
34	232.831	294.31	326.77	345.799	382.63	404.515	421.626
35	235.391	297.371	332.482	349.567	385.414	408.72	423.812
36	238.416	300.158	336.647	352.453	387.791	412.228	425.894
37	242.45	302.592	339.84	354.898	390.025	414.978	429.766
38	245.34	307.204	342.637	357.102	393.439	417.275	433.264
39	247.842	310.56	345.215	359.066	397.116	419.388	435.908
40	250.111	313.425	347.535	360.93	399.899	421.296	438.052
41	252.206	315.918	353.049	364.097	402.113	422.999	439.822
42	254.106	318.116	356.202	367.384	404.003	424.537	441.55
43	255.891	320.137	358.721	369.789	405.648	426.753	443.09
44	259.013	321.962	360.804	371.633	406.989	429.748	444.402
45	261.767	325.593	362.688	373.156	408.168	431.759	445.63
46	263.706	328.282	364.393	374.478	409.265	433.215	446.734
47	265.549	330.48	365.881	375.701	410.301	434.364	448.774

## Sheet: Figure 1 B
Time/h	0:6	1:5	2:4	3:3	4:2	5:1	6:0
0.565							0.829348
1.04861				0.199019
1.13194					0.318513
1.17194						0.894926
1.47861			0.227674
1.60194		0.159189
1.89194
2.04861				0.536999			2.65045
2.06861	0.29525
2.21194					1.22364
2.25194						3.27872
2.67861			0.566387
2.77194
2.92861				0.918968			5.03308
3.05722		1.22278
3.10722						5.94551
3.18722					4.44065
3.47083
3.7775			3.67793				7.55116
3.9075				5.35152
3.95083						8.72888
4.11083					8.33127
4.19083
4.5675	0.793233						10.3369
4.78083		4.60694
4.91083						12.7955
5.03083
5.0575			8.8172
5.0675				9.80182
5.11083					12.1905		13.2939
5.75083						14.621
5.79083
5.9475				13.3953
5.99083					14.9415
6.1775			11.3945				15.6912
6.54083		8.03666
6.67083						17.8992
6.71083
6.95083					18.0237
6.9875				16.5349
7.0075	5.33031						18.8946
7.4575			14.1537
7.51083						20.1244
7.55083
7.79083					20.7036		21.1929
7.9475				19.3084
8.45194						23.3274
8.52194		11.6078
8.57194
8.77194					23.0435
8.79861			17.2295				23.924
9.08861				22.0875
9.39389						25.5948
9.57056	10.6379
9.63861							26.1525
9.79444					25.6031
10.2464			20.005
10.2853				24.7699
10.4394						28.2142
10.8089		15.1329					28.3662
11.0231
11.0631					28.3823
11.755						30.9469
11.7917				27.4367
11.9817			22.7154
12.0214	13.4325
12.6997					31.2008		31.0638
12.8814
12.9914		18.1542
13.4783						33.7796
13.6625				30.5414
13.9011			25.6418				33.6288
14.1342	16.6407
14.8731					34.3764
15.1181		21.0095
15.3269
15.7592						37.1343
15.9558				33.7374
16.1458			28.7308
16.4178	19.6841						36.4857
17.38		23.8761
17.7242					37.6702
18.4989
18.7186				37.4477
18.7214			32.118
18.8411						40.0602
19.0178	22.8787
19.9167		27.1157					39.4836
21.4639					41.5668
21.8106			35.5696
22.0183				41.0953
22.0539	26.3884
22.9603		30.5958
22.9725
23.0261						44.197
25.4714			39.6355				43.3774
25.6567	30.1794
25.8456				45.3135
25.9053					45.6677
26.5394		34.3502
27.9989						48.133
28.8075
29.6444			43.7015
29.9689	34.2188
30.1911				49.424
30.9086					50.1391		46.7479
30.9122		38.3983
34.1936						52.5845
34.9608			48.1033
35.7478				54.3656
35.7678	38.5841
36.5369		42.8908
36.7989
37.4025					55.0085
41.8064			52.8581				51.927
42.6478						58.0809
43.1194				59.5524
43.4608	43.3082
43.7489		47.5168
47.905					60.9833
48.3608

## Sheet: Figure 1 C
Time/h	0:6	1:5	2:4	3:3	4:2	5:1	6:0
0.717778				0.00102749
0.757778			0
0.911111					0.00229725
1.19111						0.00264762
1.24778							0.00198944
1.48778	0
1.60444		0
1.87778			0.00293337
1.95778				0.00253369
2.23111					0.0046351
2.28778							0.00292862
2.39111						0.00472907
2.88611		0.00224625
3.05833				0.00432016
3.09833			0.00543696
3.56028	0
3.57611							0.00478178
3.67167					0.00797821
3.89083						0.00705203
4.42889				0.00754023
4.66889			0.00942199
4.76083		0.00470565
4.96417							0.00723179
4.96417	0
5.31194						0.0108482
5.62222
5.83056				0.0124325
6.11833							0.0113842
6.34833			0.0152669
6.56583						0.016164
6.92778					0.0217995
7.02444							0.0189565
7.10111		0.00870389
7.21444				0.0185829
7.65472
7.67389						0.0215778
7.81056							0.0260457
7.92056			0.0216888
8.32889					0.0251588
8.55028							0.0323836
8.65361						0.0257722
8.74028				0.0241321
9.23889							0.0364921
9.31556		0.0129011
9.48583					0.0296712
9.64583						0.0319562
9.8525			0.0243815
10.0225							0.0410644
10.1325				0.0277222
10.5592						0.0367471
10.6392					0.0345882
10.7358							0.0442493
11.0158	0.008577
11.4058				0.0322349
11.4858			0.0266154
11.505							0.0470379
11.5283						0.0432551
11.8883					0.0426643
11.9017		0.0180839
12.3217							0.0495194
12.5942						0.0496801
12.8008				0.0379668
13.2689					0.0553907
13.27			0.0320332
13.3656							0.0511468
13.8494						0.0547605
14.3239	0.0336328
14.4339				0.0450999
14.5206		0.0462246
14.7131							0.0530249
14.9508					0.0720854
15.3389			0.0417533
15.4736						0.0592033
16.3953				0.0565542
16.5653	0.0494164
16.5844							0.0532632
16.9056		0.0847345
17.1761					0.0958077
17.7186						0.0649808
17.7428			0.0642995
18.92	0.0613131
18.99				0.0798349
19.4347							0.0534892
19.5114		0.0938425
20.1425					0.10469
20.4339			0.0849285
21.1283						0.0717478
21.6008	0.0739472
22.1636				0.104099
22.4831		0.0909917
23.6153			0.0841871
24.1517					0.0900029
24.2483							0.0534689
24.7161	0.084406
25.8889				0.0974223
25.9194						0.0811685
25.9328		0.0900083
27.2044			0.0824765
28.3456	0.0868284
29.0694					0.0843396
30.1164		0.091676
30.1897				0.0954226
31.4611							0.0592762
31.4906			0.0842341
32.1378						0.0818053
33.0319	0.0839029
35.3903					0.0874978
35.4553				0.0988504
35.6236		0.0940175
36.9281			0.0863424
39.2736	0.0824349
40.0789						0.082804
41.9375				0.0995182
42.0789							0.0635245
42.7514		0.0946339
43.1694					0.0923946
43.7511			0.0873521
47.9683	0.0816389
